# Supplementary material
Source: ML conference proceedings conference paper supplement (https://www.ecva.net/papers/eccv_2020/papers_ECCV/html/123620086_ECCV_2020_paper.php)
Supplement: Supplementary file 1 [file 123620086-supp.pdf]

# Count- and Similarity-aware R-CNN for Pedestrian Detection

Jin Xie<sup>1\*</sup>, Hisham Cholakkal<sup>2,3\*</sup>, Rao Muhammad Anwer<sup>2,3</sup>,  
Fahad Shahbaz Khan<sup>2,3</sup>, Yanwei Pang<sup>1\*\*</sup>, Ling Shao<sup>2,3</sup>, and Mubarak Shah<sup>4</sup>

<sup>1</sup> Tianjin Key Laboratory of Brain-Inspired Artificial Intelligence, School of Electrical and Information Engineering, Tianjin University, China

<sup>2</sup> Mohamed bin Zayed University of Artificial Intelligence, UAE

<sup>3</sup> Inception Institute of Artificial Intelligence, UAE

<sup>4</sup> University of Central Florida, USA

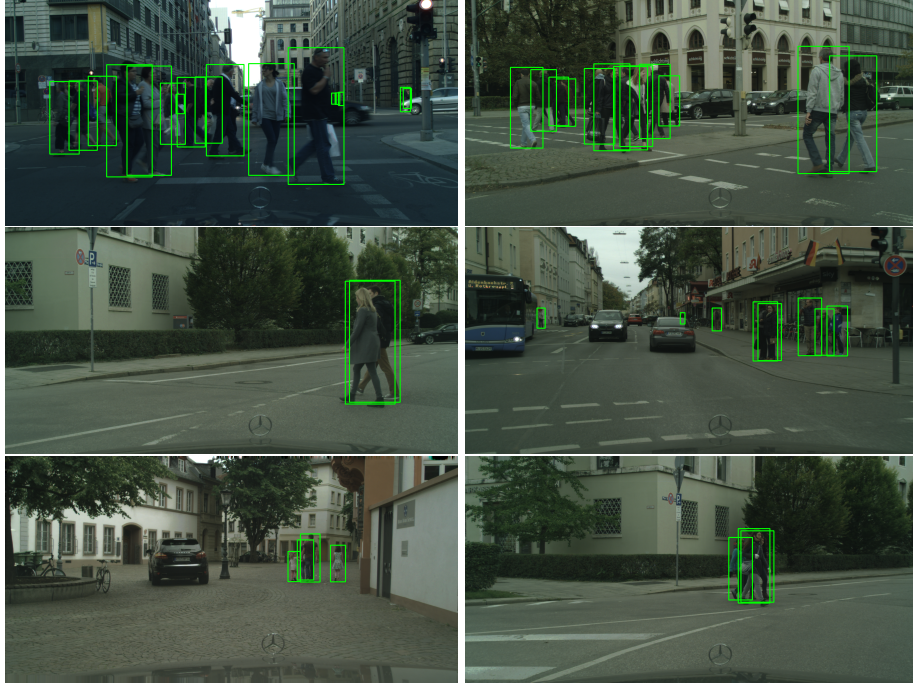

**Fig. 1.** Detection results of the proposed CaSe on CityPersons test set. Green rectangles represent detection results.

---

\* The first two authors contribute equally to this work.

\*\* Corresponding author.
